# Supplementary material for: Morphology-controlled synthesis and excellent microwave absorption performance of ZnCo2O4 nanostructures via a self-assembly process of flake units
Source: Royal Society of Chemistry journal article supplement (doi:10.1039/c8nr08601j), 2018-12-27
Supplement: c8nr08601j1.pdf [file c8nr08601j1.pdf]

## Supporting Information

# **Morphology-controlled synthesis and excellent microwave absorption performance of ZnCo<sub>2</sub>O<sub>4</sub> nanostructures via a self-assembly process of flake units**

*Xiao Li, Lei Wang, Wenbin You, Linshen Xing, Xuefeng Yu, Yuesheng Li, and Renchao Che\**

### **1. Synthesis of ball-like ZnCo<sub>2</sub>O<sub>4</sub>**

Briefly, ZnCl<sub>2</sub> (1 mmol) and CoCl<sub>2</sub>·6H<sub>2</sub>O (2 mmol) were dissolved in a mixed solvent (50 ml EG and 5 ml deionized water) under magnetic stirring at room temperature. Then, 30 mmol of NH<sub>4</sub>HCO<sub>3</sub> were added into the mixture. After being stirred for 30 min, the resultant solution was transferred into a Teflon lined stainless-steel autoclave with a capacity of 100 mL, and heated at 200°C for 24 h in an oven. The ball-like ZnCo<sub>2</sub>O<sub>4</sub> precursors were collected by centrifuging, washed with water three times and ethanol four times, and finally dried in a vacuum oven at 60°C for 8 h. Finally, the black ball-like ZnCo<sub>2</sub>O<sub>4</sub> materials were obtained after calcination at 600°C for 4 h in air. The sample was ready for further characterization.

### **2. Synthesis of hydrangea-like ZnCo<sub>2</sub>O<sub>4</sub>**

Briefly, Zn(CH<sub>3</sub>COO)<sub>2</sub>·2H<sub>2</sub>O (1 mmol) and Co(CH<sub>3</sub>COO)<sub>2</sub>·4H<sub>2</sub>O (2 mmol) were dissolved in 40 ml EG under magnetic stirring at room temperature. After being stirred for 30 min, the resultant solution was transferred into a Teflon lined stainless-steel autoclave with a capacity of 50 mL, and heated at 180°C for 12 h in an oven. The hydrangea-like ZnCo<sub>2</sub>O<sub>4</sub> precursors were collected by centrifuging, washed with water three times and ethanol four times, and finally dried in a vacuum oven at 60°C for 12 h. Finally, the black cabbage-like ZnCo<sub>2</sub>O<sub>4</sub> materials were obtained after calcination at 400°C for 2 h in air. The sample was ready for further characterization.

### **3. Synthesis of pineapple-like ZnCo<sub>2</sub>O<sub>4</sub>**

Briefly,  $\text{ZnCl}_2$  (1 mmol) and  $\text{CoCl}_2 \cdot 6\text{H}_2\text{O}$  (2 mmol) were dissolved in a mixed solvent (50 ml EG and 5 ml distilled water) under magnetic stirring. Then, 30 mmol of  $\text{NH}_4\text{HCO}_3$  and 10 mmol of urea were added to the above solution. After being stirred for 30 min, the resultant solution was transferred into a Teflon lined stainless-steel autoclave with a capacity of 100 mL, and heated at  $200^\circ\text{C}$  for 24 h in an oven. The pineapple-like  $\text{ZnCo}_2\text{O}_4$  precursors were collected by centrifuging, washed with water three times and ethanol four times, and finally dried in a vacuum oven at  $60^\circ\text{C}$  for 8 h. Finally, the black pineapple-like  $\text{ZnCo}_2\text{O}_4$  materials were obtained after calcination at  $600^\circ\text{C}$  for 4 h in air. The sample was ready for further characterization.

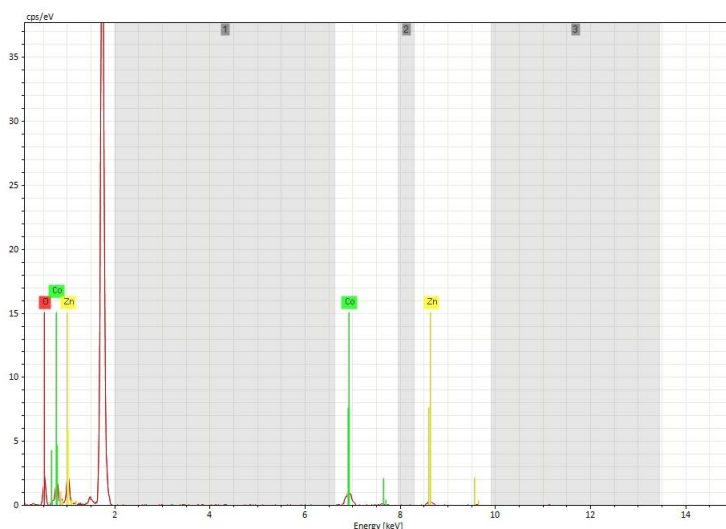

**Figure S1.** The EDS of cabbage-like  $\text{ZnCo}_2\text{O}_4$  samples.

EDS quantitative analysis shows that the atomic ration of Zn, Co and O is 1:1.96:3.68, implying a certain degree of oxygen vacancy in cabbage-like  $\text{ZnCo}_2\text{O}_4$  spinel crystal.

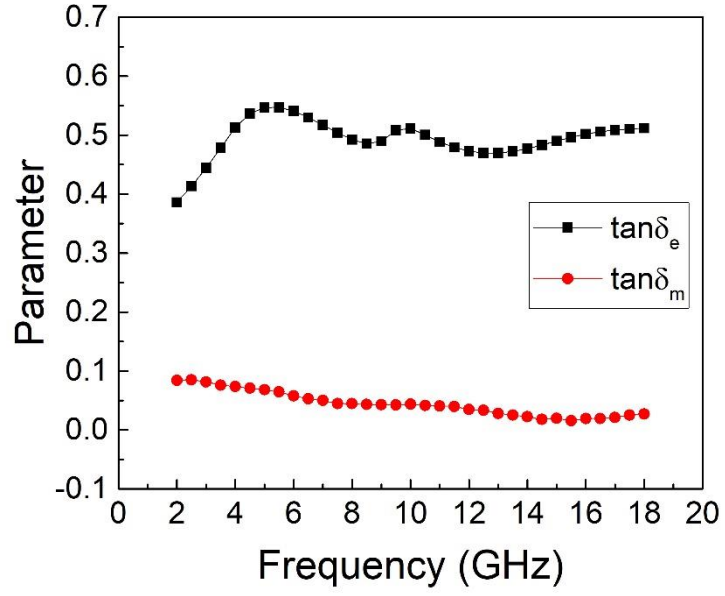

**Figure S2.** The  $\tan \delta_e$  and  $\tan \delta_m$  of as-prepared  $\text{ZnCo}_2\text{O}_4$  samples.

Because of the calculated  $\tan \delta_e$  values are much higher than that of  $\tan \delta_m$ , as-prepared  $\text{ZnCo}_2\text{O}_4$  samples can be considered as a dielectric loss-type microwave absorber.
